# Supplementary material for: Luminescent twelve-nuclear rhenium clusters
Source: Royal Society of Chemistry journal article supplement (doi:10.1039/c9dt02352f), 2019-01-01
Supplement: c9dt02352f1.pdf [file c9dt02352f1.pdf]

## Electronic supplementary information

### Luminescent twelve-nuclear rhenium clusters

Yakov M. Gayfulin,<sup>\*a</sup> Konstantin A. Brylev,<sup>a,b</sup> Maxim R. Ryzhikov,<sup>a,b</sup>  
Denis G. Samsonenko,<sup>a,b</sup> Noboru Kitamura,<sup>c</sup> Yuri V. Mironov<sup>a,b</sup>

<sup>a</sup>Nikolaev Institute of Inorganic Chemistry SB RAS, 3, Acad. Lavrentiev ave., 630090 Novosibirsk, Russia

E-mail: [gayfulin@niic.nsc.ru](mailto:gayfulin@niic.nsc.ru)

<sup>b</sup>Novosibirsk State University, 2, Pirogova str., 630090 Novosibirsk, Russia

<sup>c</sup>Department of Chemistry, Faculty of Science, Hokkaido University, 060-0810 Sapporo, Japan

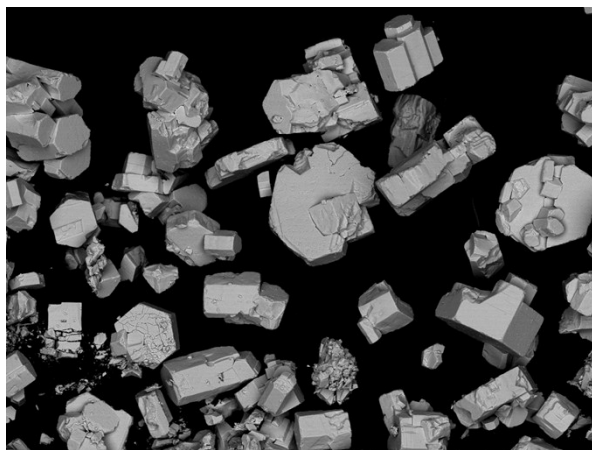

a)

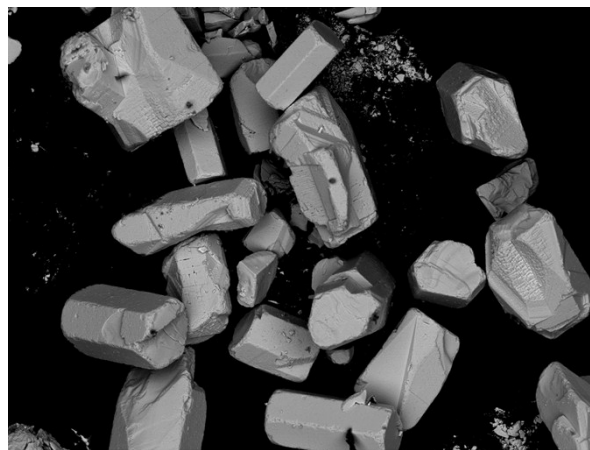

b)

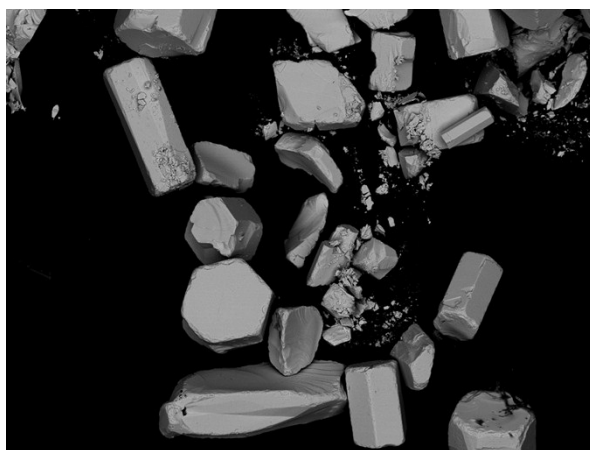

c)

**Figure S1.** SEM images of the crystals of compounds **1–3** (*a–c*, respectively).

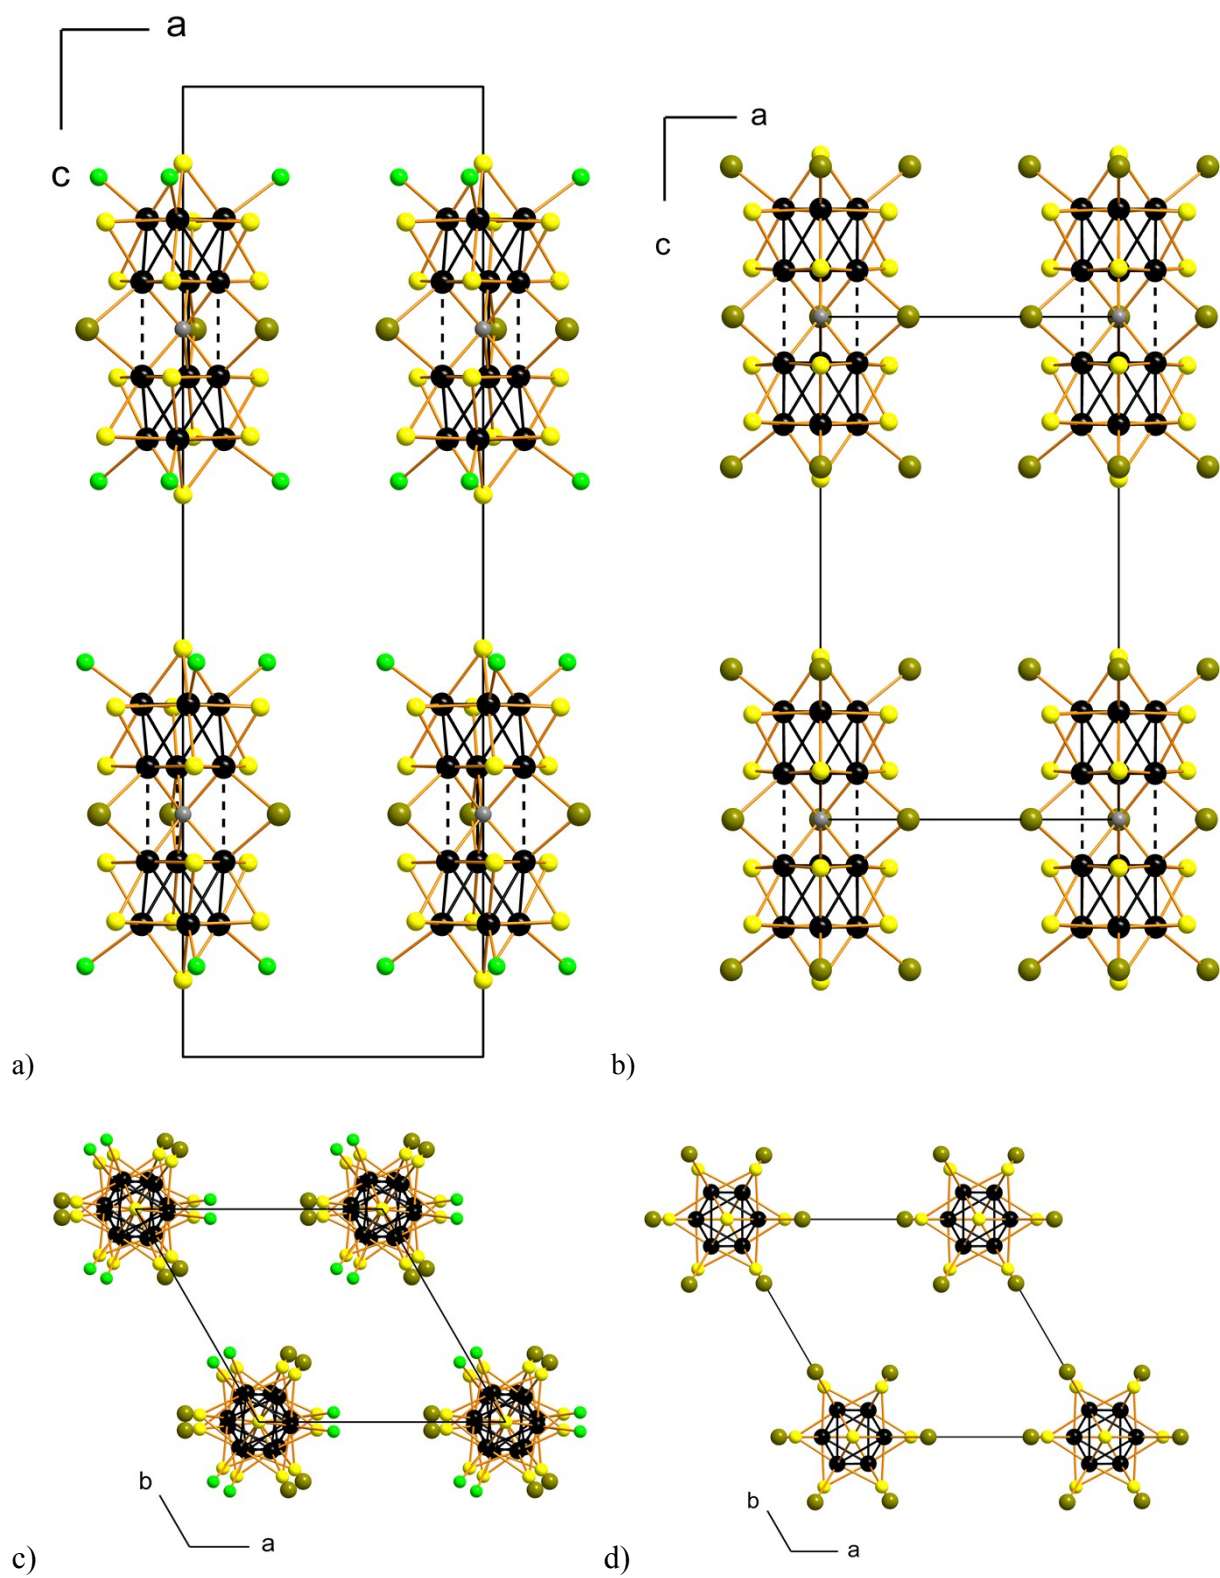

**Figure S2.** Packing of the cluster anions in the structures of the compounds 2 (a, c) and 3 (b, d).

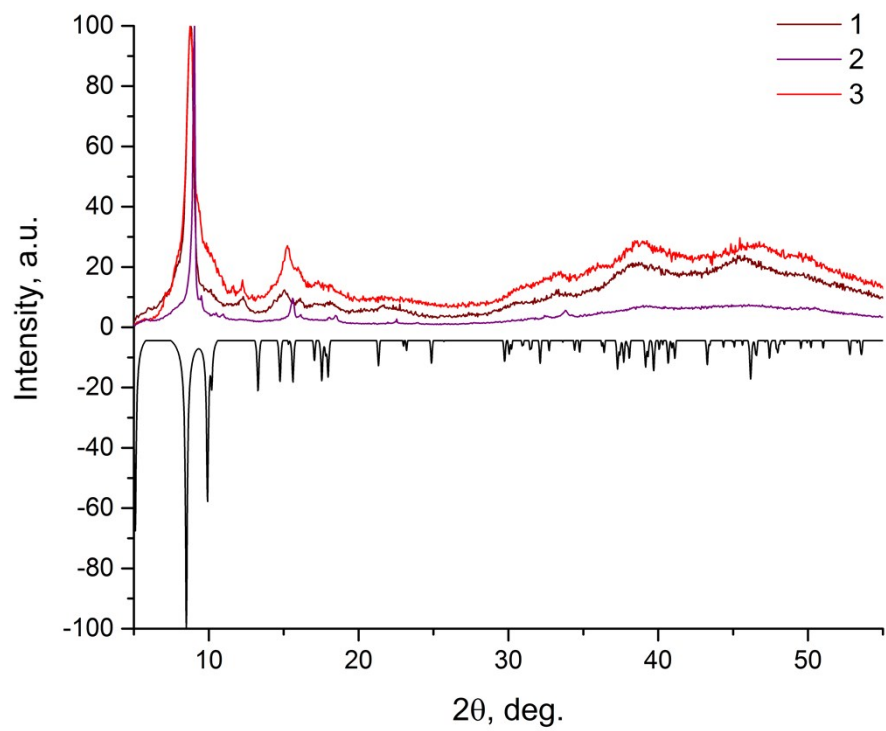

**Figure S3.** Powder patterns of the samples of compounds **1–3**.

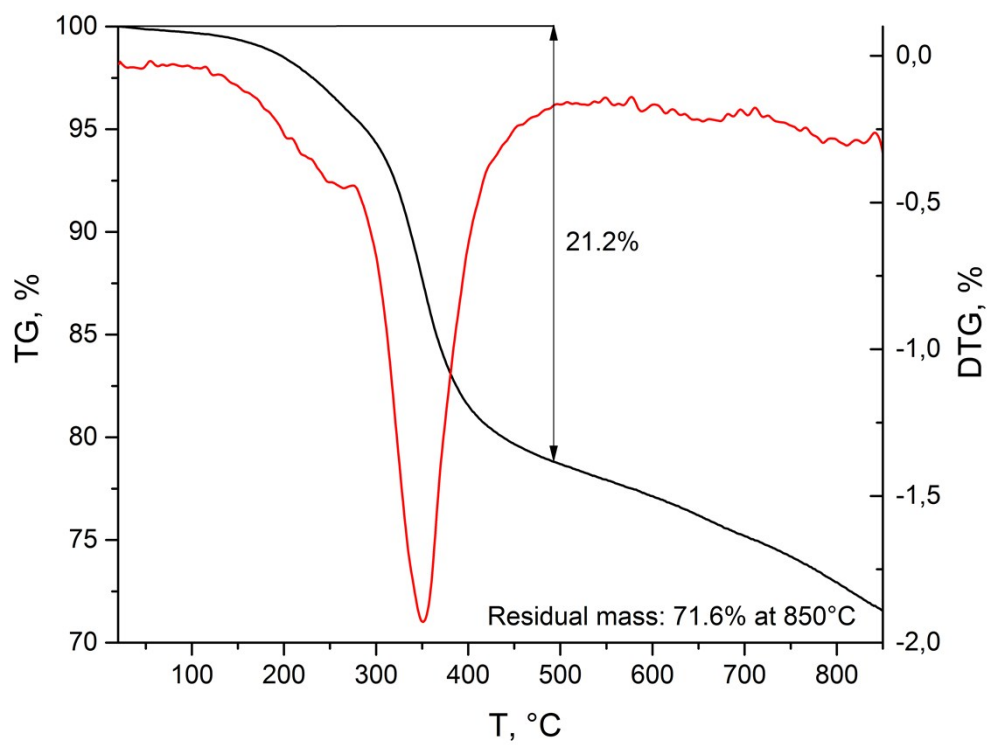

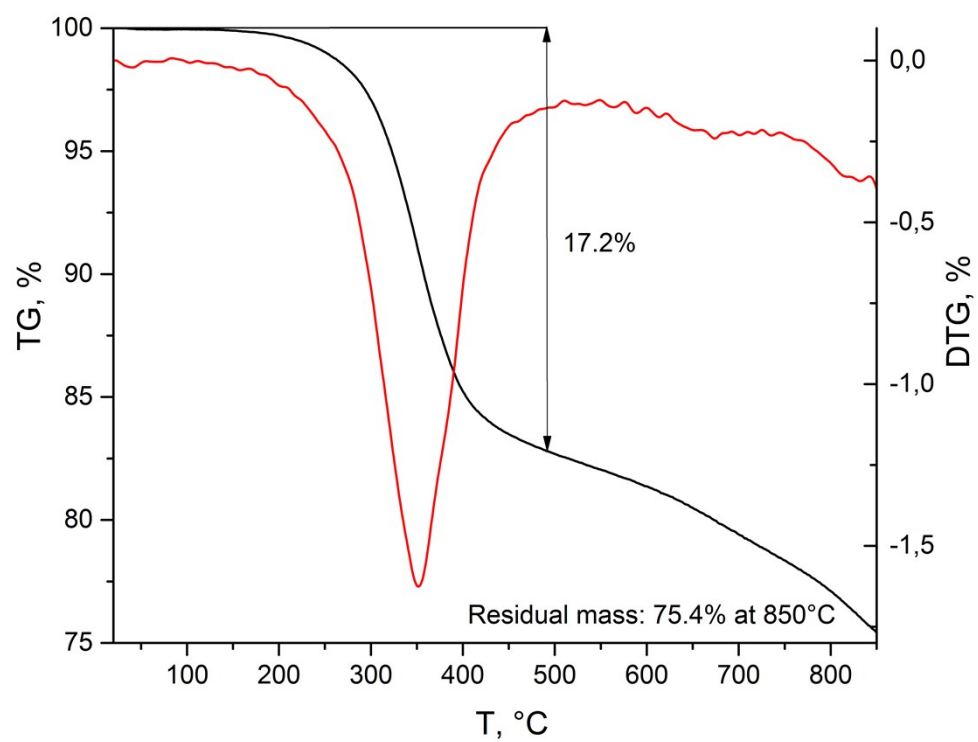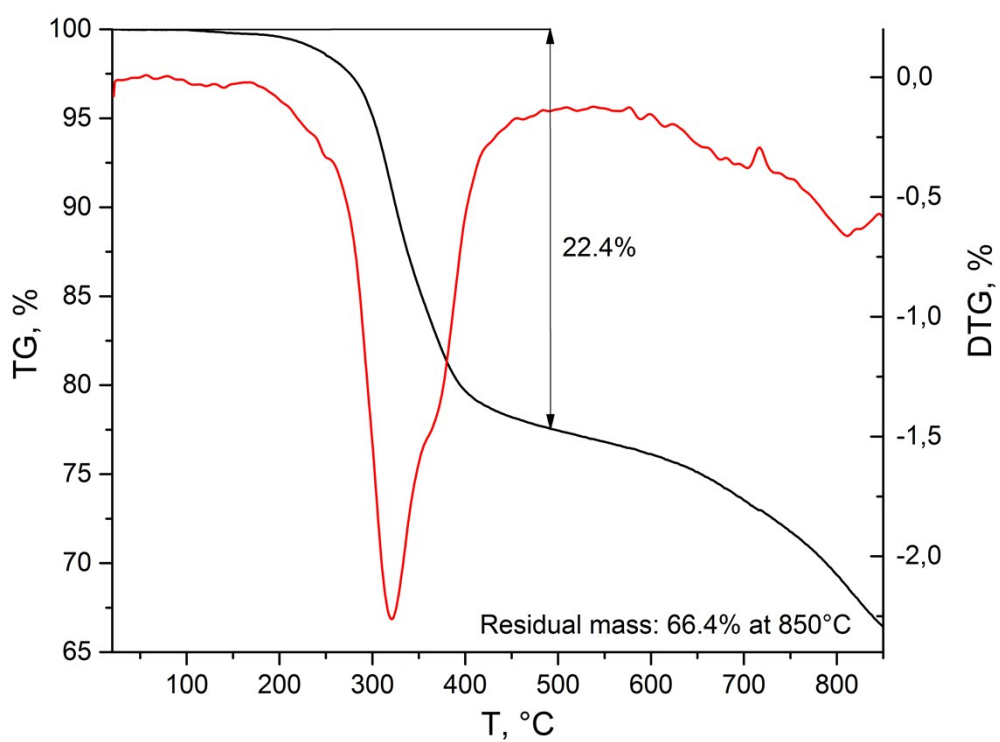

**Figure S4.** TGA and DTG curves for the samples of compounds **1–3** (a-c, respectively).

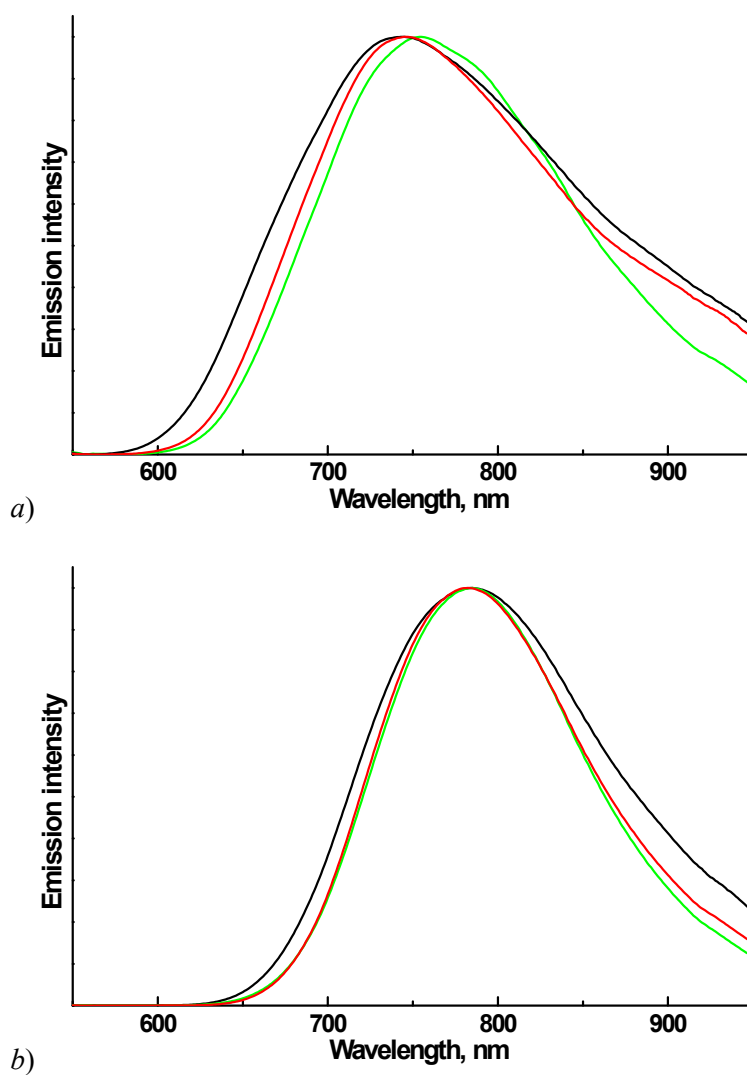

**Figure S5.** Emission spectra for **1** (black), **2** (red), and **3** (green) in the solid state at 298 K (a) and at 80 K (b). The emission intensities in each figure are normalized to those of the maximum wavelengths.

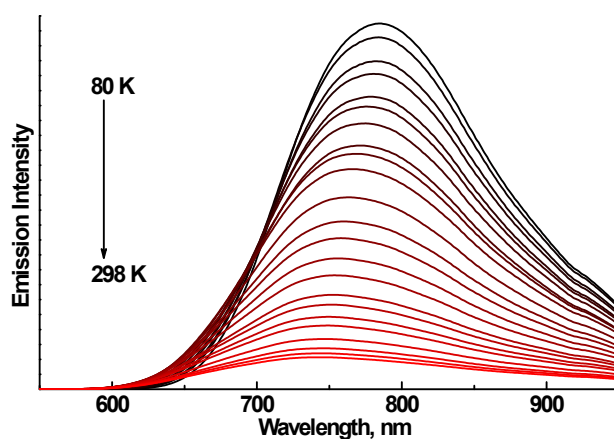

**Figure S6.** Temperature dependence of the emission spectrum of the solid sample of **1** from 80 to 298 K.

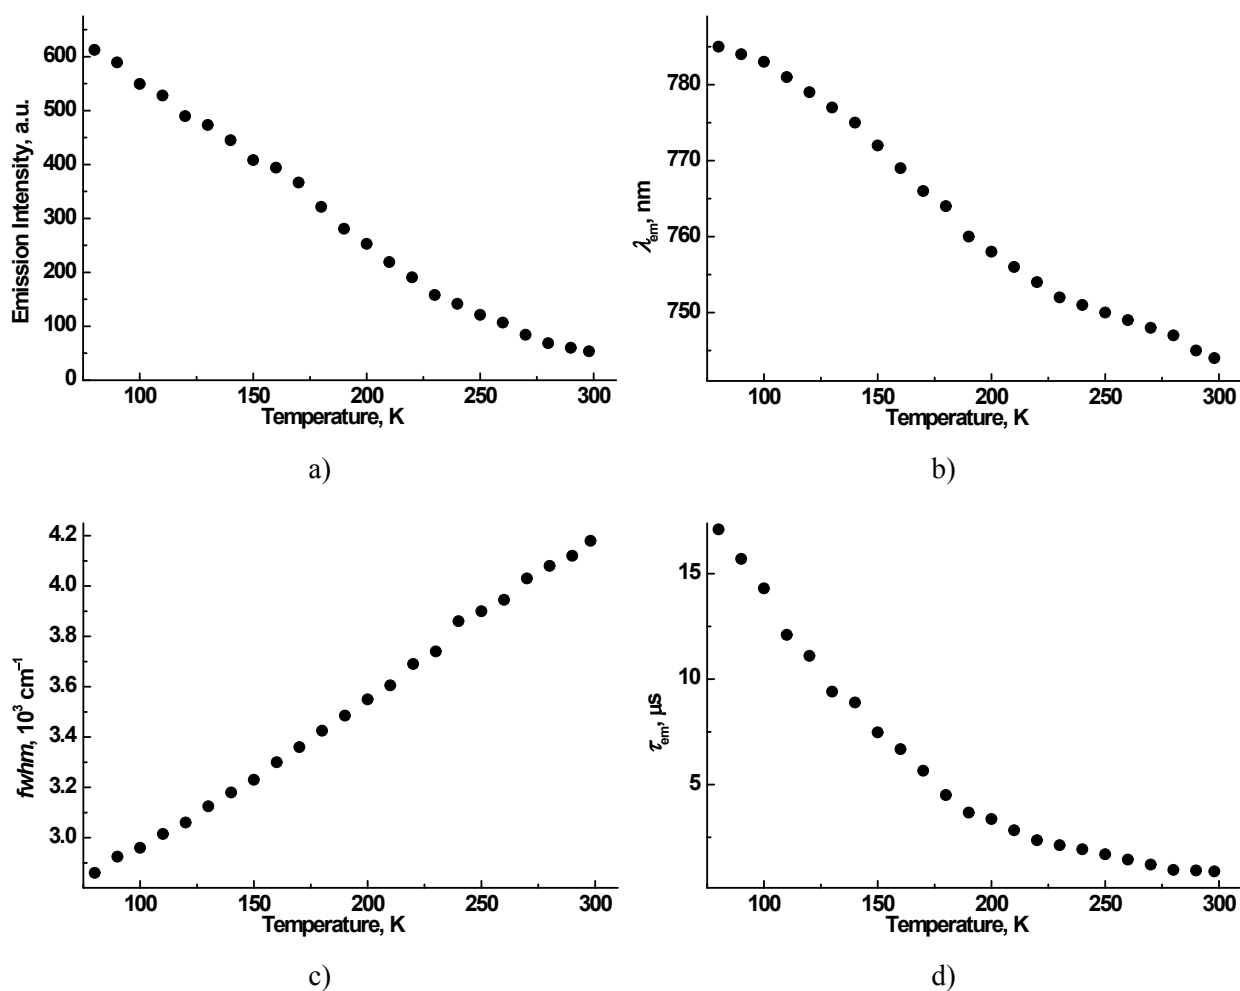

**Figure S7.** Graphic representation of temperature dependencies of emission intensity (a), emission maximum wavelength (b), fwhm (c) and long-lifetime component (d) of the solid sample of **1** from 80 to 298 K.

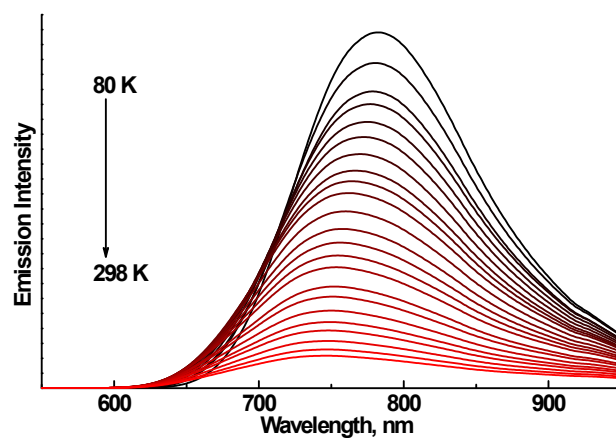

**Figure S8.** Temperature dependence of the emission spectrum of the solid sample of **2** from 80 to 298 K.

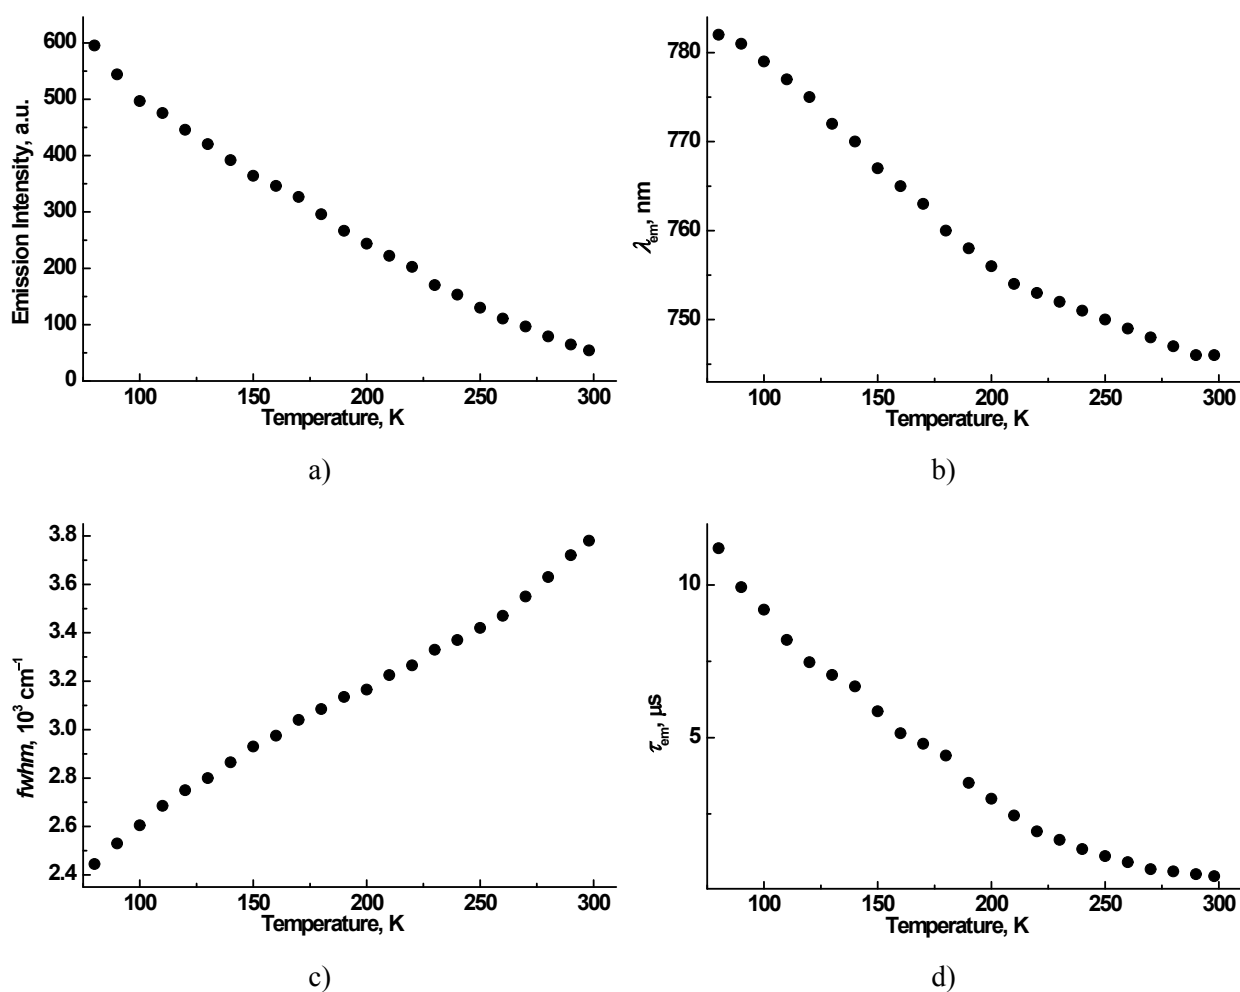

**Figure S9.** Graphic representation of temperature dependencies of emission intensity (a), emission maximum wavelength (b), fwhm (c) and long-lifetime component (d) of the solid sample of **2** from 80 to 298 K.



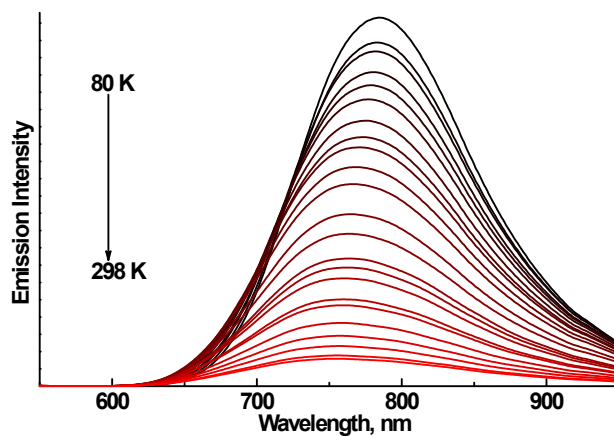

**Figure S10.** Temperature dependence of the emission spectrum of the solid sample of **3** from 80 to 298 K.

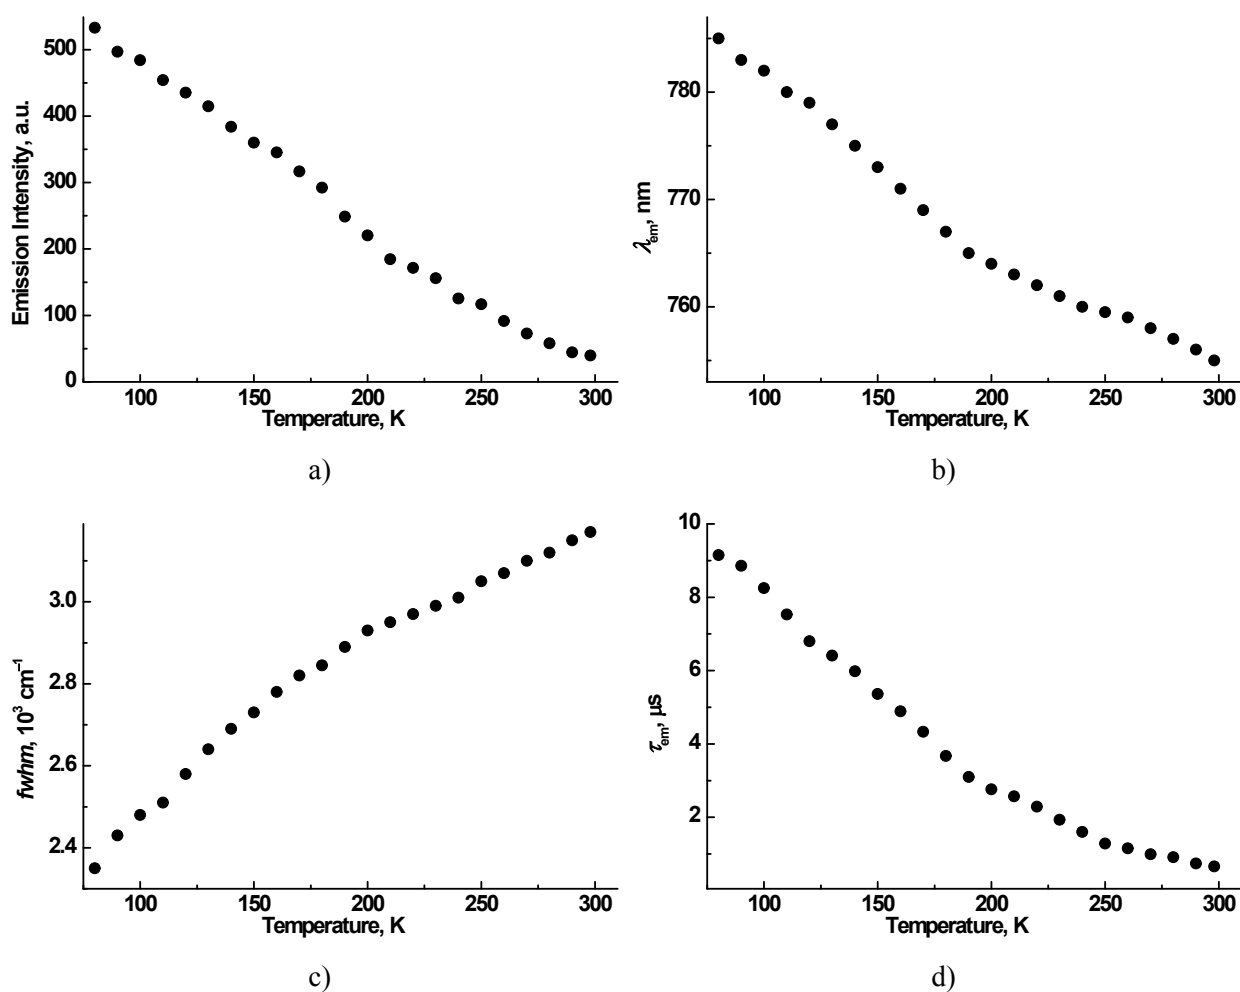

**Figure S11.** Graphic representation of temperature dependencies of emission intensity (a), emission maximum wavelength (b), fwhm (c) and long-lifetime component (d) of the solid sample of **3** from 80 to 298 K.

**Table S1.** Energy parameters of the cluster anions at the S12h/TZP//VWN+S12g/TZP level of theory

|                                                  | $[\text{Re}_{12}\text{CS}_{14}(\mu\text{-Cl})_3\text{Cl}_6]^{5-}$ | $[\text{Re}_{12}\text{CS}_{14}(\mu\text{-Br})_3\text{Cl}_6]^{5-}$ | $[\text{Re}_{12}\text{CS}_{14}(\mu\text{-Br})_3\text{Br}_6]^{5-}$ |
|--------------------------------------------------|-------------------------------------------------------------------|-------------------------------------------------------------------|-------------------------------------------------------------------|
| $E_{\text{HOMO}} / \text{eV}$                    | -5.35                                                             | -5.19                                                             | -5.17                                                             |
| $E_{\text{LUMO}} / \text{eV}$                    | -1.80                                                             | -1.76                                                             | -1.76                                                             |
| $\Delta E_{\text{LUMO-HOMO}} / \text{eV}$        | 3.55                                                              | 3.43                                                              | 3.41                                                              |
| $E(\text{S0}) / \text{eV}$                       | -332.43                                                           | -330.58                                                           | -326.55                                                           |
| $E(\text{T1}) / \text{eV}$                       | -330.40                                                           | -328.56                                                           | -324.55                                                           |
| $E(\text{S0}_{\text{T1}}) / \text{eV}$           | -331.84                                                           | -329.97                                                           | -325.93                                                           |
| $\Delta E(\text{T1-S0}) / \text{eV}$             | 2.03                                                              | 2.02                                                              | 2.00                                                              |
| $\Delta E(\text{T1-S0}) / \text{nm}$             | 611                                                               | 614                                                               | 620                                                               |
| $\Delta E(\text{T1-S0}_{\text{T1}}) / \text{eV}$ | 1.44                                                              | 1.41                                                              | 1.39                                                              |
| $\Delta E(\text{T1-S0}_{\text{T1}}) / \text{nm}$ | 861                                                               | 879                                                               | 892                                                               |
